# Supplementary material for: The Parenting and Family Adjustment Scales (PAFAS): an Indonesian Validation Study
Source: Springer Nature journal article supplement (doi:10.1007/s10826-017-0926-y), 2017-11-03
Supplement: MOESM1 [file 15191500]

**Supplementary Materials**

**Parenting and Family Adjustment Scales (PAFAS)**

Please read each statement and select a number 0, 1, 2 or 3 that indicates how true the statement was of you *over the past four (4) weeks*. There are no right or wrong answers. Do not spend too much time on any statement.

The rating scale is as follows:

0. Not true of me at all

1. True of me a little, or some of the time

2. True of me quite a lot, or a good part of the time

3. True of me very much, or most of the time

|  | **How true is this  of you?** | | | |
| --- | --- | --- | --- | --- |
|  | Not at all | A little | Quite a lot | Very  much |
| 1. If my child doesn’t do what they’re told to do, I give in and do it myself | 0 | 1 | 2 | 3 |
| 1. *I give my child a treat, reward or fun activity for behaving well | 0 | 1 | 2 | 3 |
| 1. *I follow through with a consequence (e.g. take away a toy) when my child misbehaves | 0 | 1 | 2 | 3 |
| 1. I threaten something (e.g. to turn off TV) when my child misbehaves but I don’t follow through | 0 | 1 | 2 | 3 |
| 1. I shout or get angry with my child when they misbehave | 0 | 1 | 2 | 3 |
| 1. I praise my child when they behave well | 0 | 1 | 2 | 3 |
| 1. I try to make my child feel bad (e.g. guilt or shame) for misbehaving to teach them a lesson | 0 | 1 | 2 | 3 |
| 1. I give my child attention (e.g. a hug, wink, smile or kiss) when they behave well | 0 | 1 | 2 | 3 |
| 1. I spank (smack) my child when they misbehave | 0 | 1 | 2 | 3 |
| 1. I argue with my child about their behavior / attitude | 0 | 1 | 2 | 3 |
| 1. *I deal with my child’s misbehavior the same way all the time | 0 | 1 | 2 | 3 |
| 1. I give my child what they want when they get angry or upset | 0 | 1 | 2 | 3 |
| 1. I get annoyed with my child | 0 | 1 | 2 | 3 |
| 1. I chat / talk with my child | 0 | 1 | 2 | 3 |
| 1. I enjoy giving my child hugs, kisses and cuddles | 0 | 1 | 2 | 3 |
| 1. I am proud of my child | 0 | 1 | 2 | 3 |
| 1. I enjoy spending time with my child | 0 | 1 | 2 | 3 |
| 1. I have a good relationship with my child | 0 | 1 | 2 | 3 |
| 1. *I feel stressed or worried | 0 | 1 | 2 | 3 |
| 1. I feel happy | 0 | 1 | 2 | 3 |
| 1. I feel sad or depressed | 0 | 1 | 2 | 3 |
| 1. I feel satisfied with my life | 0 | 1 | 2 | 3 |
| 1. *I cope with the emotional demands of being a parent | 0 | 1 | 2 | 3 |
| 1. Our family members help or support each other | 0 | 1 | 2 | 3 |
| 1. Our family members get on well with each other | 0 | 1 | 2 | 3 |
| 1. Our family members fight or argue | 0 | 1 | 2 | 3 |
| 1. *Our family members criticize or put each other down | 0 | 1 | 2 | 3 |
|  | **How true is this  of you?** | | | |
| **If you are in the relationship please answer the following 3 questions** | Not at all | A little | Quite a lot | Very much |
| 1. I work as a team with my partner in parenting | 0 | 1 | 2 | 3 |
| 1. *I disagree with my partner about parenting | 0 | 1 | 2 | 3 |
| 1. I have a good relationship with my partner | 0 | 1 | 2 | 3 |

*Note*: * Based on the results of CFA with Indonesian parents, the items were deleted.

**The Indonesian version of Parenting and Family Adjustment Scales (PAFAS)**

Bacalah setiap pernyataan dan pilihlah salah satu angka 0, 1, 2, atau 3 yang menandakan kesesuaian pernyataan tersebut dengan diri Anda selama **empat (4) minggu terakhir**. Tidak ada jawaban benar atau salah. Jangan menghabiskan waktu terlalu lama pada setiap pernyataan.

Skala penilaian yang digunakan adalah sebagai berikut:

0. Tidak sesuai sama sekali dengan diri saya

1. Agak sesuai dengan diri saya atau kadang-kadang sesuai

2. Cukup sesuai dengan diri saya atau sesuai dalam banyak kesempatan

3. Sangat sesuai dengan diri saya atau hampir selalu sesuai di berbagai kesempatan

|  | **Sejauhmana hal ini sesuai dengan diri Anda?** | | | | | | | | |
| --- | --- | --- | --- | --- | --- | --- | --- | --- | --- |
|  | Tidak sama sekali | Sedikit sesuai | | Cukup sesuai | | | Sangat sesuai | | |
| 1. Apabila anak saya tidak mau melakukan apa yang saya suruh, saya menyerah dan melakukan pekerjaan itu sendiri. | 0 | 1 | 2 | | 3 | | |
| 1. *Saya memberi anak saya sesuatu, hadiah, atau kegiatan yang menyenangkan karena ia berperilaku baik. | 0 | 1 | 2 | | 3 | | |
| 1. *Saya menindaklanjuti dengan memberikan konsekuensi atau akibat kepada anak saya (misal: dengan mengambil mainannya) ketika ia berulah. | 0 | 1 | 2 | | 3 | | |
| 1. Saya memberikan ancaman kepada anak (misal: dengan mematikan televisi) apabila anak saya berulah, namun saya tidak benar-benar menjalankan ancaman tersebut. | 0 | 1 | 2 | | 3 | | |
| 1. Saya membentak atau marah kepada anak saya apabila ia berbuat sesuatu yang tidak baik. | 0 | 1 | 2 | | 3 | | |
| 1. Saya memuji anak saya apabila ia berperilaku baik. | 0 | 1 | 2 | | 3 | | |
| 1. Saya berusaha membuat anak saya merasa tidak enak (misal: merasa bersalah atau malu) atas ulahnya yang tidak baik agar ia mendapat pelajaran dari hal tersebut. | 0 | 1 | 2 | | 3 | | |
| 1. Saya memberi anak saya perhatian (misalnya dengan pelukan, kedipan mata, senyuman atau ciuman) ketika anak berperilaku baik. | 0 | 1 | 2 | | 3 | | |
| 1. Saya menampar (memukul) anak saya saat ia menunjukkan perilaku yang tidak baik. | 0 | 1 | 2 | | 3 | | |
| 1. Saya berdebat dengan anak saya mengenai perilaku atau sikapnya. | 0 | 1 | 2 | | 3 | | |
| 1. *Saya menangani ulah anak yang tidak baik dengan cara yang sama di setiap waktu. | 0 | 1 | 2 | | 3 | | |
| 1. Saya memberi apa yang anak minta sewaktu ia menunjukkan kemarahan atau kejengkelannya. | 0 | 1 | 2 | | 3 | | |
| 1. Saya merasa kesal dengan anak saya. |  |  |  | |  | | |
| 1. Saya berbicang-bincang/mengobrol dengan anak saya. | 0 | 1 | 2 | | 3 | | |
| 1. Saya senang merangkul, mencium, dan memeluk anak saya. |  |  |  | |  | | |
| 1. Saya bangga dengan anak saya. | 0 | 1 | 2 | | 3 | | |
| 1. Saya senang menghabiskan waktu bersama dengan anak. |  |  |  | |  | | |
| 1. Saya memiliki hubungan yang baik dengan anak saya. | 0 | 1 | 2 | | 3 | | |
| 1. *Saya merasa tertekan atau cemas. | 0 | 1 | 2 | | 3 | | |
| 1. Saya merasa bahagia. | 0 | 1 | 2 | | 3 | | |
| 1. Saya merasa sedih atau depresi. | 0 | 1 | 2 | | 3 | | |
| 1. Saya merasa puas dengan hidup saya. | 0 | 1 | 2 | | 3 | | |
| 1. *Saya mampu mengatasi tekanan emosional sebagai orangtua. | 0 | 1 | 2 | | 3 | | |
| 1. Anggota keluarga kami saling membantu dan mendukung. | 0 | 1 | 2 | | 3 | | |
| 1. Anggota keluarga kami berhubungan baik satu sama lain (rukun). | 0 | 1 | 2 | | 3 | | |
| 1. Anggota keluarga kami suka bertengkar atau berdebat. | 0 | 1 | 2 | | 3 | | |
| 1. *Anggota keluarga kami suka mengkritik atau mencela satu sama lain. | 0 | 1 | 2 | | | 3 | |
|  |  |  |  | | |  | |
|  | **Sejauhmana hal ini sesuai dengan diri Anda?** | | | | | | | |
| **Apabila Anda memiliki pasangan (suami atau istri), silakan menjawab 3 pertanyaan berikut ini.** | Tidak sama sekali | Sedikitsesuai | Cukup sesuai | | | Sangat sesuai | | |
| 1. Saya bekerja sama dengan pasangan saya dalam hal pengasuhan anak. | 0 | 1 | 2 | | 3 | | | |
| 1. *Saya tidak setuju dengan pasangan saya dalam hal pengasuhan anak. | 0 | 1 | 2 | | 3 | | | |
| 1. Saya memiliki hubungan yang baik dengan pasangan saya (rukun). | 0 | 1 | 2 | | 3 | | | |

*Note*: * Based on the results of CFA with Indonesian parents, the items were deleted.
